# Supplementary material for: Photon energy storage materials with high energy densities based on diacetylene–azobenzene derivatives
Source: Royal Society of Chemistry journal article supplement (doi:10.1039/c6ta07086h), 2016-01-01
Supplement: c6ta07086h1.pdf [file c6ta07086h1.pdf]

## Electronic Supplementary Information (ESI)

# Photon Energy Storage Materials with High Energy Densities Based on Diacetylene-Azobenzene Derivatives

Ggoch Ddeul Han, Sarah Sunah Park, Yun Liu, David Zhitomirsky, Eugene Cho, Mircea Dincă, and Jeffrey C. Grossman\*

**Synthesis of azobenzene-functionalized diacetylenes (monomers)**  $^1\text{H}$  and  $^{13}\text{C}$  NMR spectra are shown in Fig. S11.

**Compound 1.** To a solution of dodeca-5,7-diynedioic acid (490 mg, 2.2 mmol) in dichloromethane (50 mL), oxalyl chloride (567  $\mu\text{L}$ , 6.6 mmol) was added dropwise at room temperature and stirred for 10 min. Catalytic amount (a drop) of dimethylformamide was added to the mixture, and the solution was stirred overnight generating  $\text{CO}_2$  (g), CO (g), and HCl (g) through a bubbler. The reaction mixture was dried under reduced pressure (50 mTorr) for 2 h to obtain dodeca-5,7-diynedioyl dichloride (light brown oil) which was used for the next step without further purification. The dichloride (356 mg, 1.37 mmol) was dissolved in dry THF (2 mL) which was added dropwise to the mixture of 4-phenylazoaniline (813 mg, 4.12 mmol) and triethylamine (1.7 mL, 12.4 mmol) in dichloromethane (50 mL). After the gas evolution stopped, the mixture was stirred overnight, and the resulting precipitate was filtered, rinsed with dichloromethane, and dried under reduced pressure. The light yellow powder product (621.1 mg) was obtained with 78.1 % yield. mp 266  $^\circ\text{C}$ ;  $^1\text{H}$  NMR (500 MHz,  $\text{DMF-}d_7$ ,  $\delta$ ): 10.50 (s, 2H; N-H), 7.95 (m, 12H; Ar H), 7.61 (m, 6H; Ar H), 2.60 (t, 4H;  $\text{CH}_2$ ), 2.47 (t, 4H;  $\text{CH}_2$ ), 1.90 (m, 4H;  $\text{CH}_2$ );  $^{13}\text{C}$  NMR (500 MHz,  $\text{DMF-}d_7$ ,  $\delta$ ): 172.17 (C=O), 153.49 (Ar), 148.88 (Ar), 143.90 (Ar), 131.89 (Ar), 130.32 (Ar, C-H), 124.67 (Ar, C-H), 123.40 (Ar, C-H), 120.24 (Ar, C-H), 78.23

(C≡C), 66.61 (C≡C), 36.38 (CH<sub>2</sub>), 24.92 (CH<sub>2</sub>), 19.09 (CH<sub>2</sub>); HRMS (ESI)  $m/z$ : [M + H]<sup>+</sup> calcd for C<sub>36</sub>H<sub>32</sub>N<sub>6</sub>O<sub>2</sub>, 581.2660; found, 581.2640.; Anal. Calcd for C<sub>36</sub>H<sub>32</sub>N<sub>6</sub>O<sub>2</sub>: C, 74.46; H, 5.55; N, 14.47%. Found: C, 74.23; H, 5.57; N, 14.29%.

**Compound 2.** To a solution of hexadeca-7,9-diynedioic acid (170 mg, 0.61 mmol) in dichloromethane (50 mL), oxalyl chloride (157  $\mu$ L, 1.83 mmol) was added dropwise at room temperature and stirred for 10 min. Catalytic amount (a drop) of dimethylformamide was added to the mixture, and the solution was stirred overnight generating CO<sub>2</sub> (g), CO (g), and HCl (g) through a bubbler. The reaction mixture was dried under reduced pressure (50 mTorr) for 2 h to obtain hexadeca-7,9-diynedioyl dichloride (light yellow oil) which was used for the next step without further purification. The dichloride (192.3 mg, 0.61 mmol) was dissolved in dry THF (2 mL) which was added dropwise to the mixture of 4-phenylazoaniline (361 mg, 1.83 mmol) and triethylamine (765  $\mu$ L, 5.49 mmol) in dichloromethane (50 mL). After the gas evolution stopped, the mixture was stirred overnight, and the resulting precipitate was filtered, rinsed with dichloromethane, and dried under reduced pressure. The light yellow powder product (321.9 mg) was obtained with 82.9 % yield. mp 233 °C; <sup>1</sup>H NMR (500 MHz, DMF-*d*<sub>7</sub>,  $\delta$ ): 10.41 (s, 2H; N-H), 7.95 (m, 12H; Ar H), 7.62 (m, 6H; Ar H), 2.46 (t, 4H; CH<sub>2</sub>), 2.35 (t, 4H; CH<sub>2</sub>), 1.70 (m, 4H; CH<sub>2</sub>), 1.55 (m, 4H; CH<sub>2</sub>), 1.46 (m, 4H; CH<sub>2</sub>); <sup>13</sup>C NMR (500 MHz, DMF-*d*<sub>7</sub>,  $\delta$ ): 172.82 (C=O), 153.49 (Ar), 148.84 (Ar), 143.98 (Ar), 131.89 (Ar), 130.32 (Ar, C-H), 124.68 (Ar, C-H), 123.38 (Ar, C-H), 120.18 (Ar, C-H), 78.60 (C≡C), 66.27 (C≡C), 37.59 (CH<sub>2</sub>), 29.21 (CH<sub>2</sub>), 28.93 (CH<sub>2</sub>), 25.74 (CH<sub>2</sub>), 19.32 (CH<sub>2</sub>); HRMS (ESI)  $m/z$ : [M + Na]<sup>+</sup> calcd for C<sub>40</sub>H<sub>40</sub>N<sub>6</sub>O<sub>2</sub>, 659.3105; found, 659.3109.; Anal. Calcd for C<sub>40</sub>H<sub>40</sub>N<sub>6</sub>O<sub>2</sub>: C, 75.45; H, 6.33; N, 13.20%. Found: C, 75.19; H, 6.16; N, 13.04%.

**Compound 3.** To a solution of docosa-10,12-diynedioic acid (310 mg, 0.86 mmol) in dichloromethane (50 mL), oxalyl chloride (220  $\mu$ L, 2.6 mmol) was added dropwise at room temperature and stirred for 10 min. Catalytic amount (a drop) of dimethylformamide was added to the mixture, and the solution was stirred overnight generating CO<sub>2</sub> (g), CO (g), and HCl (g) through a bubbler. The reaction mixture was dried under reduced pressure (50 mTorr) for 2 h to obtain docosa-10,12-diynedioyl dichloride (light yellow oil) which was used for the next step without further purification. The dichloride (343 mg, 0.86 mmol) was dissolved in dry THF (2 mL) which was added dropwise to the mixture of 4-phenylazoaniline (509 mg, 2.58 mmol) and triethylamine (1.1 mL, 7.7 mmol) in dichloromethane (50 mL). After the gas evolution stopped, the mixture was stirred overnight, and the resulting precipitate was filtered, rinsed with dichloromethane, and dried under reduced pressure. The light yellow powder product (456.6 mg) was obtained with 73.6 % yield. mp 213 °C; <sup>1</sup>H NMR (500 MHz, DMF-*d*<sub>7</sub>,  $\delta$ ): 10.37 (s, 2H; N-H), 7.95 (m, 12H; Ar H), 7.61 (m, 6H; Ar H), 2.45 (t, 4H; CH<sub>2</sub>), 2.32 (t, 4H; CH<sub>2</sub>), 1.69 (m, 4H; CH<sub>2</sub>), 1.49 (m, 4H; CH<sub>2</sub>), 1.32 (m, 16H; CH<sub>2</sub>); <sup>13</sup>C NMR (500 MHz, DMF-*d*<sub>7</sub>,  $\delta$ ): 173.37 (C=O), 153.88 (Ar), 149.20 (Ar), 144.41 (Ar), 132.26 (Ar, C-H), 130.70 (Ar, C-H), 125.06 (Ar, C-H), 123.76 (Ar, C-H), 120.53 (Ar, C-H), 79.06 (C $\equiv$ C), 66.61 (C $\equiv$ C), 38.15 (CH<sub>2</sub>), 30.35 (CH<sub>2</sub>), 30.24 (CH<sub>2</sub>), 30.10 (CH<sub>2</sub>), 29.96 (CH<sub>2</sub>), 29.48 (CH<sub>2</sub>), 26.65 (CH<sub>2</sub>), 19.76 (CH<sub>2</sub>); HRMS (ESI) *m/z*: [M + Na]<sup>+</sup> calcd for C<sub>46</sub>H<sub>52</sub>N<sub>6</sub>O<sub>2</sub>, 743.4044; found, 743.4044.; Anal. Calcd for C<sub>46</sub>H<sub>52</sub>N<sub>6</sub>O<sub>2</sub>: C, 76.63; H, 7.27; N, 11.66%. Found: C, 76.49; H, 7.16; N, 11.49%.

**Compound 4.** The docosa-10,12-diynedioyl dichloride (166 mg, 0.42 mmol) was dissolved in dry THF (2 mL) which was added dropwise to the mixture of 4-phenylazophenol (248 mg, 1.25 mmol) and triethylamine (522  $\mu$ L, 3.75 mmol) in dichloromethane (50 mL). After the gas evolution stopped, the mixture was stirred overnight. The clear yellow solution was dried under reduced pressure to leave orange powder which was dispersed and sonicated in the mixture of

dichloromethane (3 mL) and hexane (15 mL). The resulting precipitate was filtered, rinsed with dichloromethane/hexane, and dried under reduced pressure. The yellow powder was re-dissolved in dichloromethane (20 mL), extracted with H<sub>2</sub>O three times, dried over MgSO<sub>4</sub>, cooled in an ice bath, and filtered to remove impurity (white salt). The filtrate was dried under reduced pressure. The light yellow powder product (216.7 mg) was obtained with 72.1 % yield. mp 136 °C; <sup>1</sup>H NMR (500 MHz, CD<sub>2</sub>Cl<sub>2</sub>, δ): 7.99 (m, 4H; Ar H), 7.93 (m, 4H; Ar H), 7.56 (m, 6H; Ar H), 7.28 (d, 4H; Ar H), 2.61 (t, 4H; CH<sub>2</sub>), 2.27 (t, 4H; CH<sub>2</sub>), 1.77 (m, 4H; CH<sub>2</sub>), 1.40 (m, 20H; CH<sub>2</sub>); <sup>13</sup>C NMR (500 MHz, CD<sub>2</sub>Cl<sub>2</sub>, δ): 172.62 (C=O), 153.64 (Ar), 153.21 (Ar), 150.82 (Ar), 131.80 (Ar, C–H), 129.81 (Ar, C–H), 124.60 (Ar, C–H), 123.45 (Ar, C–H), 123.07 (Ar, C–H), 78.23 (C≡C), 65.78 (C≡C), 34.96 (CH<sub>2</sub>), 29.78 (CH<sub>2</sub>), 29.68 (CH<sub>2</sub>), 29.58 (CH<sub>2</sub>), 29.46 (CH<sub>2</sub>), 29.05 (CH<sub>2</sub>), 25.49 (CH<sub>2</sub>), 19.76 (CH<sub>2</sub>); HRMS (ESI) *m/z*: [M + H]<sup>+</sup> calcd for C<sub>46</sub>H<sub>50</sub>N<sub>4</sub>O<sub>4</sub>, 723.3905; found, 723.4007.; Anal. Calcd for C<sub>46</sub>H<sub>50</sub>N<sub>4</sub>O<sub>4</sub>: C, 76.43; H, 6.97; N, 7.75%. Found: C, 76.16; H, 6.80; N, 7.71%.

Compound **5**. The docosa-10,12-diynedioyl dichloride (166 mg, 0.42 mmol) was dissolved in dry THF (2 mL) which was added dropwise to the mixture of *N,N*-dimethyl-4,4'-azodianiline (300 mg, 1.25 mmol) and triethylamine (522 μL, 3.75 mmol) in dichloromethane (50 mL). After the gas evolution stopped, the mixture was stirred overnight, and the resulting precipitate was filtered, rinsed with dichloromethane, and dried under reduced pressure. The light yellow-brown powder product (253.0 mg) was obtained with 75.4 % yield.; <sup>1</sup>H NMR (500 MHz, DMF-*d*<sub>7</sub>, δ): 10.25 (s, 2H; N-H), 7.88 (d, 4H; Ar H), 7.82 (m, 8H; Ar H), 6.89 (d, 4H; Ar H), 3.10 (s, 12H; CH<sub>3</sub>), 2.43 (t, 4H; CH<sub>2</sub>), 2.32 (t, 4H; CH<sub>2</sub>), 1.68 (m, 4H; CH<sub>2</sub>), 1.50 (m, 4H; CH<sub>2</sub>), 1.32 (m, 16H; CH<sub>2</sub>); <sup>13</sup>C NMR (500 MHz, DMF-*d*<sub>7</sub>, δ): 172.77 (C=O), 153.47 (Ar), 149.35 (Ar), 144.18 (Ar), 142.45 (Ar), 125.36 (Ar, C–H), 123.60 (Ar, C–H), 120.17 (Ar, C–H), 112.55 (Ar, C–H), 78.69 (C≡C), 66.24 (C≡C), 40.47 (CH<sub>3</sub>), 37.74 (CH<sub>2</sub>), 30.06 (CH<sub>2</sub>), 30.00 (CH<sub>2</sub>), 29.73 (CH<sub>2</sub>), 29.58

(CH<sub>2</sub>), 29.11 (CH<sub>2</sub>), 26.36 (CH<sub>2</sub>), 19.38 (CH<sub>2</sub>); HRMS (ESI)  $m/z$ : [M + H]<sup>+</sup> calcd for C<sub>50</sub>H<sub>62</sub>N<sub>8</sub>O<sub>2</sub>, 807.5068; found, 807.5069.

Compound **6**. The docosa-10,12-diynedioyl dichloride (166 mg, 0.42 mmol) was dissolved in dry THF (2 mL) which was added dropwise to the solution of Disperse black 9 (375 mg, 1.25 mmol) in dichloromethane/THF (50 mL). The mixture was stirred at 60 °C overnight, and the resulting dark blue material was hydrolyzed by Na<sub>2</sub>CO<sub>3</sub> (aq). The mixture was extracted with H<sub>2</sub>O, and the precipitate in organic layer was filtered, rinsed with dichloromethane and acetone, and dried under reduced pressure. The orange powder product (216.4 mg) was obtained with 56.1 % yield.; <sup>1</sup>H NMR (500 MHz, DMF-*d*<sub>7</sub>, δ): 10.22 (s, 2H; N-H), 7.87 (d, 4H; Ar H), 7.80 (m, 8H; Ar H), 6.94 (d, 4H; Ar H), 3.76 (t, 8H; CH<sub>2</sub>), 3.67 (t, 8H; CH<sub>2</sub>), 2.42 (t, 4H; CH<sub>2</sub>), 2.32 (t, 4H; CH<sub>2</sub>), 1.68 (m, 4H; CH<sub>2</sub>), 1.50 (m, 4H; CH<sub>2</sub>), 1.32 (m, 16H; CH<sub>2</sub>); <sup>13</sup>C NMR (500 MHz, DMF-*d*<sub>7</sub>, δ): 172.69 (C=O), 151.88 (Ar), 149.46 (Ar), 143.90 (Ar), 142.21 (Ar), 125.52 (Ar, C–H), 123.58 (Ar, C–H), 120.16 (Ar, C–H), 112.39 (Ar, C–H), 78.69 (C≡C), 66.25 (C≡C), 59.85 (CH<sub>2</sub>), 54.80 (CH<sub>2</sub>), 37.76 (CH<sub>2</sub>), 30.06 (CH<sub>2</sub>), 30.00 (CH<sub>2</sub>), 29.74 (CH<sub>2</sub>), 29.59 (CH<sub>2</sub>), 29.12 (CH<sub>2</sub>), 26.34 (CH<sub>2</sub>), 19.40 (CH<sub>2</sub>); HRMS (ESI)  $m/z$ : [M + H]<sup>+</sup> calcd for C<sub>54</sub>H<sub>70</sub>N<sub>8</sub>O<sub>6</sub>, 927.5494; found, 927.5509.

Compound **7**. The docosa-10,12-diynedioyl dichloride (166 mg, 0.42 mmol) was dissolved in dry THF (2 mL) which was added dropwise to the mixture of Disperse orange 3 (303 mg, 1.25 mmol) and triethylamine (522 μL, 3.75 mmol) in dichloromethane (50 mL). After the gas evolution stopped, the mixture was stirred overnight, and the resulting precipitate was filtered, rinsed with dichloromethane, and dried under reduced pressure. The brown powder product (110.5 mg) was obtained with 32.8 % yield.; <sup>1</sup>H NMR (500 MHz, DMF-*d*<sub>7</sub>, δ): 10.71 (s, 2H; N-H), 8.50 (d, 4H; Ar H), 8.13 (d, 4H; Ar H), 8.02 (m, 8H; Ar H), 2.49 (t, 4H; CH<sub>2</sub>), 2.32 (t, 4H;

CH<sub>2</sub>), 1.69 (m, 4H; CH<sub>2</sub>), 1.50 (m, 4H; CH<sub>2</sub>), 1.32 (m, 16H; CH<sub>2</sub>); <sup>13</sup>C NMR (500 MHz, DMF-*d*<sub>7</sub>, δ): 173.31 (C=O), 156.84 (Ar), 149.40 (Ar), 148.78 (Ar), 145.42 (Ar, C–H), 125.98 (Ar, C–H), 125.50 (Ar, C–H), 124.25 (Ar, C–H), 120.23 (Ar, C–H), 78.69 (C≡C), 66.25 (C≡C), 37.78 (CH<sub>2</sub>), 30.04 (CH<sub>2</sub>), 29.97 (CH<sub>2</sub>), 29.73 (CH<sub>2</sub>), 29.57 (CH<sub>2</sub>), 29.10 (CH<sub>2</sub>), 26.26 (CH<sub>2</sub>), 19.39 (CH<sub>2</sub>); HRMS (ESI) *m/z*: [M + H]<sup>+</sup> calcd for C<sub>46</sub>H<sub>50</sub>N<sub>8</sub>O<sub>6</sub>, 811.3926; found, 811.3903.

**Compound 8.** The docosa-10,12-diynedioyl dichloride (166 mg, 0.42 mmol) was dissolved in dry THF (2 mL) which was added dropwise to the mixture of Disperse orange 13 (440 mg, 1.25 mmol) and triethylamine (522 μL, 3.75 mmol) in dichloromethane (50 mL). After the gas evolution stopped, the mixture was stirred overnight. The dark red solution was mixed with hexane (150 mL), and the resulting precipitate was filtered, rinsed with dichloromethane/hexane (1:2) and acetone, then dried under reduced pressure. The red powder product (400.6 mg) was obtained with 93.5 % yield.; <sup>1</sup>H NMR (500 MHz, CD<sub>2</sub>Cl<sub>2</sub>, δ): 9.06 (m, 4H; Ar H), 8.14 (m, 10H; Ar H), 7.81 (m, 4H; Ar H), 7.62 (m, 8H; Ar H), 7.34 (d, 4H; Ar H), 2.63 (t, 4H; CH<sub>2</sub>), 2.28 (t, 4H; CH<sub>2</sub>), 1.79 (m, 4H; CH<sub>2</sub>), 1.43 (m, 20H; CH<sub>2</sub>); <sup>13</sup>C NMR (500 MHz, CD<sub>2</sub>Cl<sub>2</sub>, δ): 172.60 (C=O), 154.02 (Ar), 153.97 (Ar), 151.53 (Ar), 149.67 (Ar), 149.58 (Ar), 132.89 (Ar), 132.24 (Ar), 129.95 (Ar, C–H), 128.05 (Ar, C–H), 125.14 (Ar, C–H), 124.26 (Ar, C–H), 123.23 (Ar, C–H), 124.01 (Ar, C–H), 123.22 (Ar, C–H), 112.90 (Ar, C–H), 112.86 (Ar, C–H), 78.25 (C≡C), 65.81 (C≡C), 34.99 (CH<sub>2</sub>), 29.79 (CH<sub>2</sub>), 29.69 (CH<sub>2</sub>), 29.59 (CH<sub>2</sub>), 29.47 (CH<sub>2</sub>), 29.06 (CH<sub>2</sub>), 25.50 (CH<sub>2</sub>), 19.78 (CH<sub>2</sub>); HRMS (ESI) *m/z*: [M + H]<sup>+</sup> calcd for C<sub>66</sub>H<sub>62</sub>N<sub>8</sub>O<sub>4</sub>, 1031.4967; found, 1031.4961.

### **Synthesis of polydiacetylenes via photopolymerization of diacetylene monomers**

Diacetylene monomers were dispersed and sonicated in a solvent (dichloromethane or dichloromethane/hexane) without much dissolution, then dropcast onto a glass substrate to form

a non-transparent thick film. A UV lamp (254 nm, 4 W) was placed 3–4 cm above the diacetylene film over several minutes depending on the rate of photopolymerization of each monomer. The films typically turn from light yellow to blue or purple, indicating the formation of polydiacetylenes. Then the polymer films were scraped off from the substrate and re-dispersed in a solvent to dropcast a new film, if the content of monomer was visually significant. The process of photopolymerization was repeated until the color of monomer disappeared.

**Fig. S1.** Azobenzene-functionalized diacetylenes with various terminal functional groups.

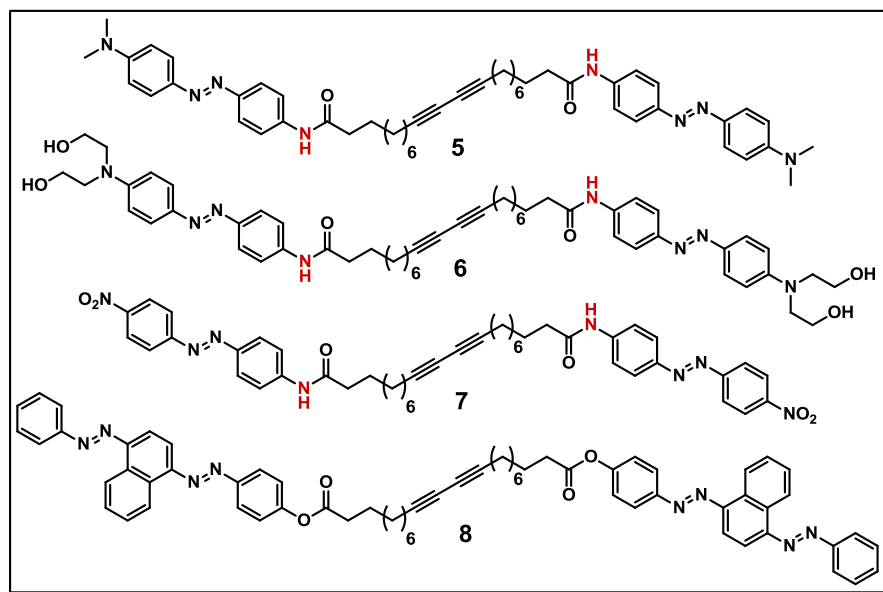

Compound **5–8** are docosa-10,12-diynes that are amide- or ester-linked to azobenenes functionalized with terminal groups. Compound **5** and **6** both incorporate electron-donating amino groups, and particularly compound **6** has alcohol groups for additional H-bonding capability. Compound **7** has electron-withdrawing nitro groups while compound **8** includes 1,4-bis(phenyldiazenyl)naphthalene groups which lead to greater volume change over isomerization compared to azobenzene groups. Tailoring electron density and delocalization on azo groups affects their optical properties such as HOMO–LUMO gap and  $\pi$ – $\pi^*/n$ – $\pi^*$  transitions which determine the chargeability of photon energy storage materials.



**Fig. S2.** (a) Molecular packing of compound **3** shown along  $a$  axis. C=O and N-H groups are staggered, hence intermolecular H-bonding is absent along this direction. Red, gray, blue and white spheres represent O, C, N and H atoms, respectively. H atoms omitted for clarity. (b) PXRD patterns of compound **3** compared to that simulated for single crystals.

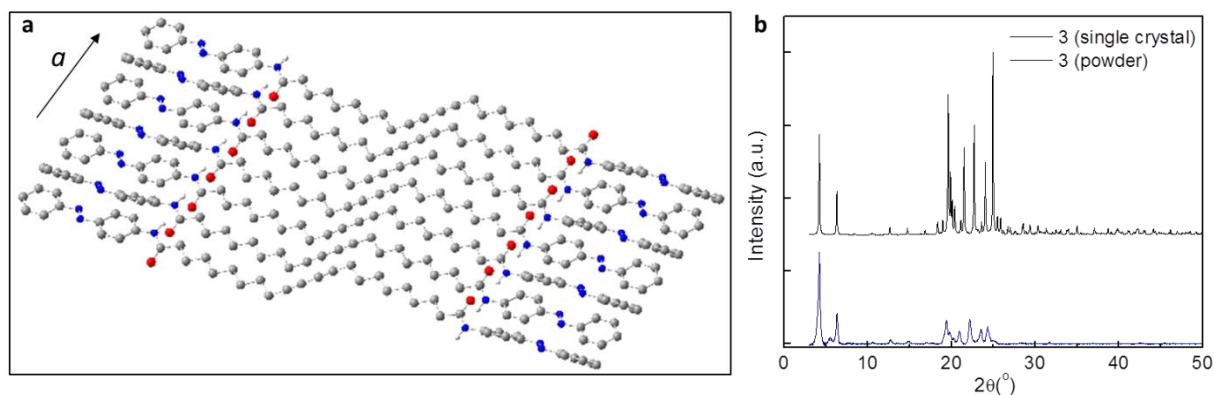

**Fig. S3.** A structure of polymer **3** optimized from *ab initio* simulations where side chains are packed along  $b$  axis. Blue, red, light blue, and white spheres correspond to N, O, C, and H atoms, respectively. Silver shade around the atoms represents the charge density iso-surface at the value of  $0.1 \text{ e } \text{\AA}^{-3}$ . As observed from the overlapping of the charge density iso-surface, no hydrogen bonding exists between the amide groups

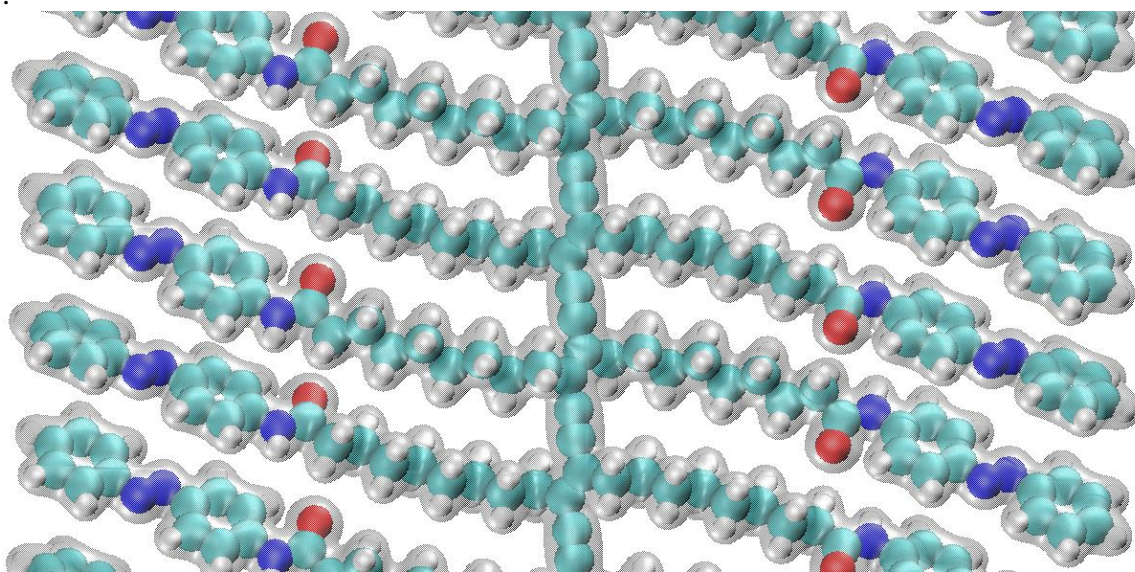

**Fig. S4.** Reversible thermochromism of polymer **3** films observed by variable-temperature UV–Vis absorption spectroscopy while heating up to 200 °C and cooling down to room temperatures. Inset shows the photographs of the films that change the color reversibly.

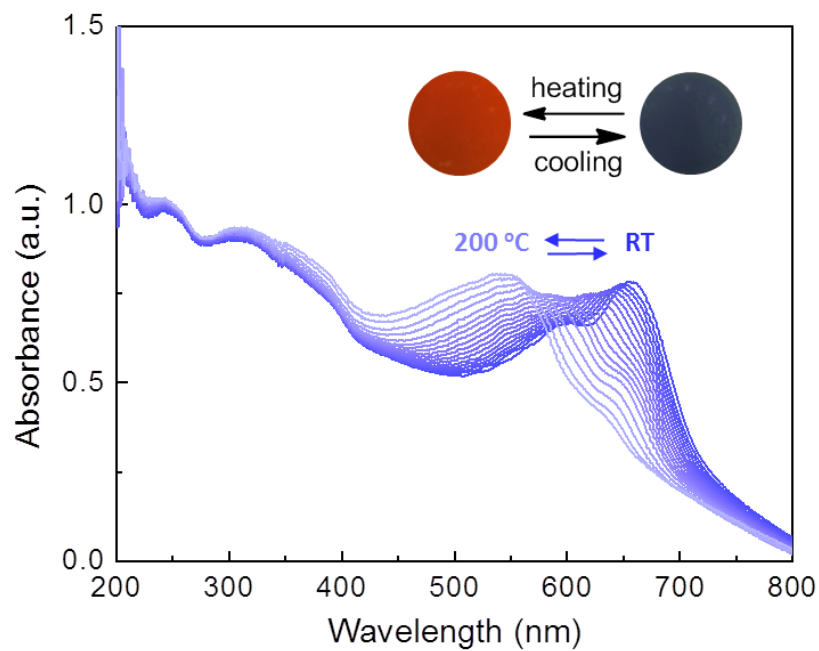



**Fig. S6.** DSC analysis of charged compound **1** heated and cooled at 5 °C min<sup>-1</sup> for two consecutive cycles.

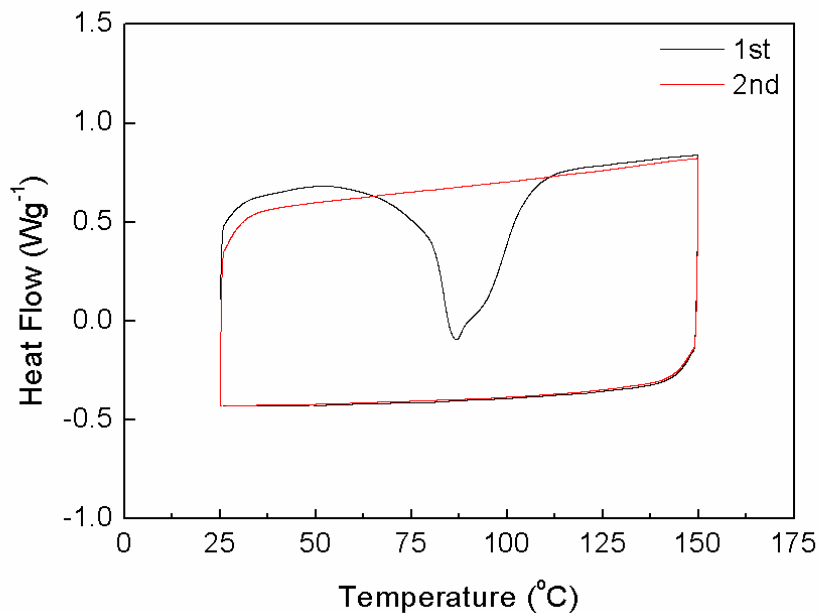

The heating of charged *cis* molecules results in the thermal reversion to *trans* isomers which do not exhibit endothermic or exothermic behaviors. The identical phenomenon is observed for the other compounds (**2–4**) within the relative temperature range.

### Kinetic studies on thermal reverse isomerization and $t_{0.5}$ of compound 3–4.

**Fig. S7 (a).** Eyring-Polanyi plot ( $R^2 = 0.99997$ ) for the thermal *cis*→*trans* isomerization of compound **3** in DMF.  $\Delta H^\ddagger = 88.74$  kJ/mol;  $\Delta S^\ddagger = -45.82$  kJ/mol;  $t_{0.5} = 1.16$  d (27.8 h).

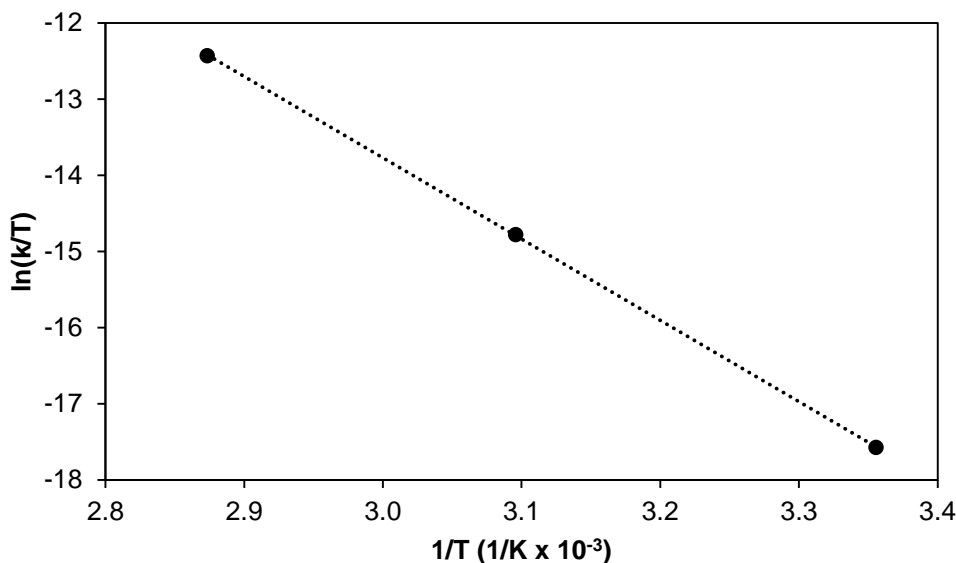

**Fig. S7 (b).** Eyring-Polanyi plot ( $R^2 = 0.99998$ ) for the thermal *cis*→*trans* isomerization of compound **4** in DMF.  $\Delta H^\ddagger = 88.70$  kJ/mol;  $\Delta S^\ddagger = -56.58$  kJ/mol;  $t_{0.5} = 4.10$  d (98.4 h).

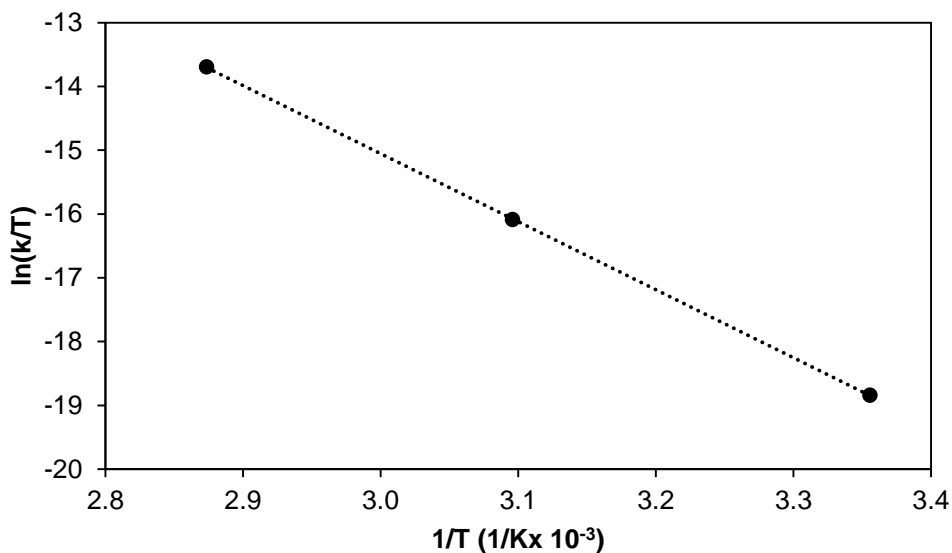

Solutions of compound **3** (92.8  $\mu\text{M}$ ) and **4** (79.1  $\mu\text{M}$ ) in DMF were individually irradiated with 365 nm light while recording absorption spectra over time until the photostationary state was generated. They were then placed in dark and heated to the desired temperatures (25  $^\circ\text{C}$ , 50  $^\circ\text{C}$ , and 75  $^\circ\text{C}$ ), and the spectra were recorded over time to monitor the thermal reverse isomerization process. The solutions were vigorously stirred at all times.

The absorbance vs. time over the range of 342 nm to 352 nm at 1 nm increment were fit to the following formula. The obtained first order rate constant k is the average over this range.

$$\Delta OD = a(1 - be^{-kt})$$

The Eyring – Polanyi analysis follows the following equation

$$\ln \frac{k}{T} = -\frac{\Delta H^\ddagger}{R} \frac{1}{T} + \ln \frac{k_B}{h} + \frac{\Delta S^\ddagger}{R}$$

where k is the rate constant, T is the temperature, R is the gas constant,  $k_B$  is the Boltzmann constant, h is the Plank's constant,  $\Delta H^\ddagger$  is the enthalpy of activation, and  $\Delta S^\ddagger$  is the entropy of activation.

The half-life at 25°C was computed directly using the rate constant extracted from absorbance vs. time spectra at 25°C.

$$t_{0.5} = \frac{\ln 2}{k}$$

**Table S1.** Rate constants of compound **3** and **4** at respective temperatures.

| Compound | $k \times 10^6$ (sec <sup>-1</sup> ) at 25 °C | 50 °C  | 75 °C   |
|----------|-----------------------------------------------|--------|---------|
| <b>3</b> | 6.94                                          | 123.16 | 1390.84 |
| <b>4</b> | 1.96                                          | 33.28  | 391.76  |

**Fig. S8.** (a-d) PXRD of monomer **1-4** as synthesized (*trans*), charged (*cis*), discharged (*trans*), and melt-crystallized (*trans*). (e) PXRD of monomer **5-8** as synthesized (*trans*).

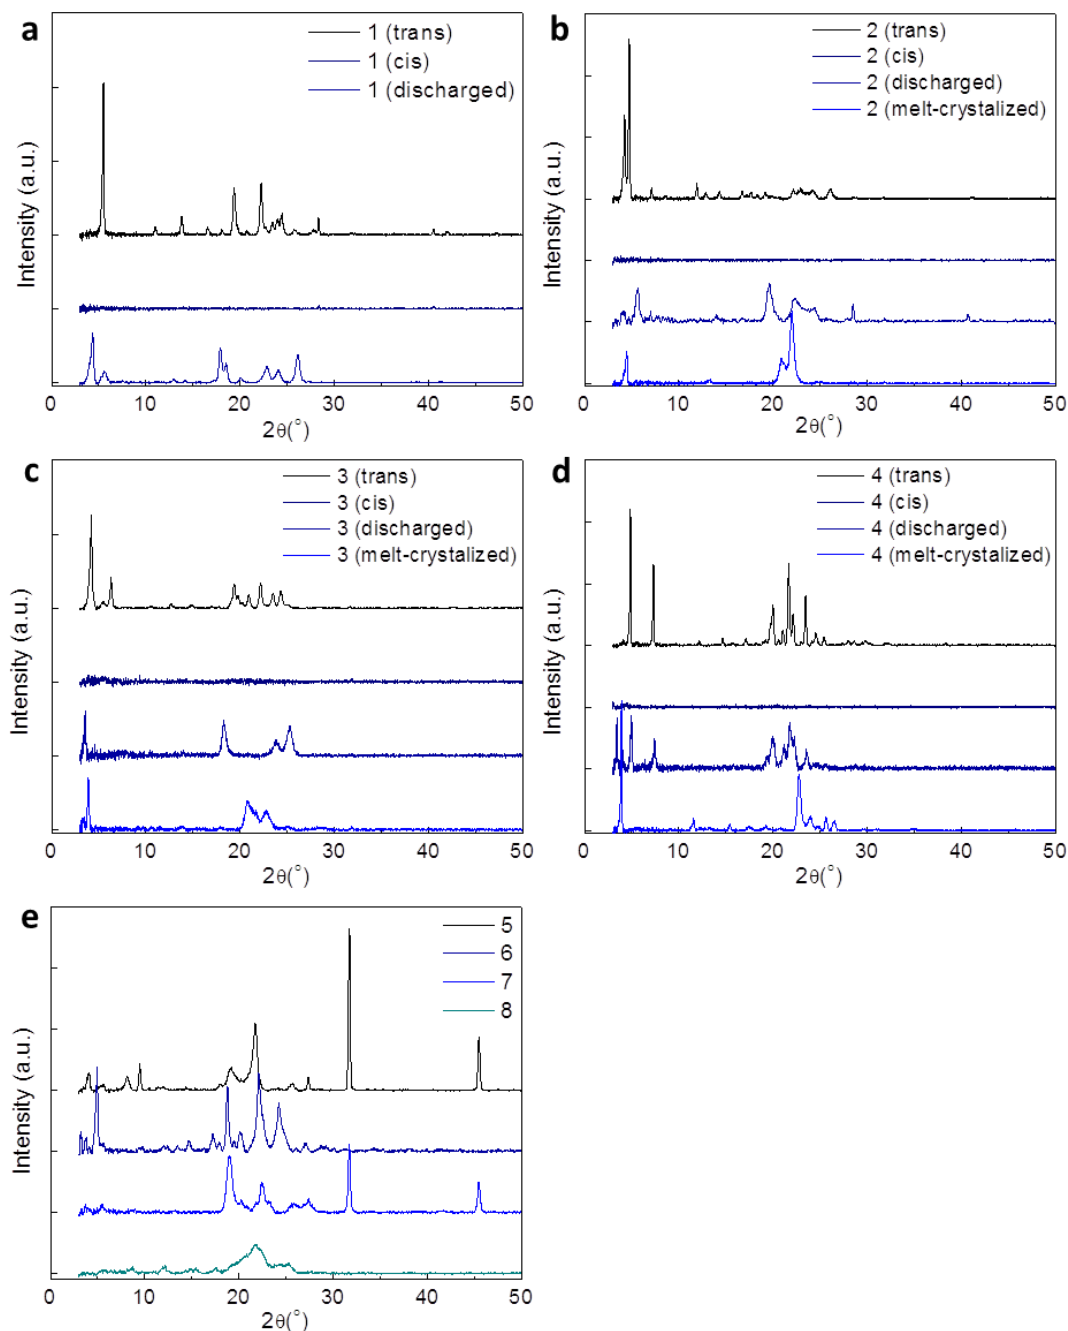

In order to gauge how similar the isomerization-assisted phase transition from amorphous or liquid state to crystalline solid state is compared to the traditional liquid-to-solid phase transition, PXRD of compound **2-4** were also taken after melt-crystallization by DSC. The melt-crystallized solid exhibits different diffraction patterns from those of the discharged compounds often with enhanced crystallinity. Compound **1** was decomposed during melting, so melt-crystallization was not accomplished.

**Fig. S9.** (a-d) PXRD of polymer **1-4** as synthesized (trans), charged (cis), discharged (trans), and melt-crystallized (trans).

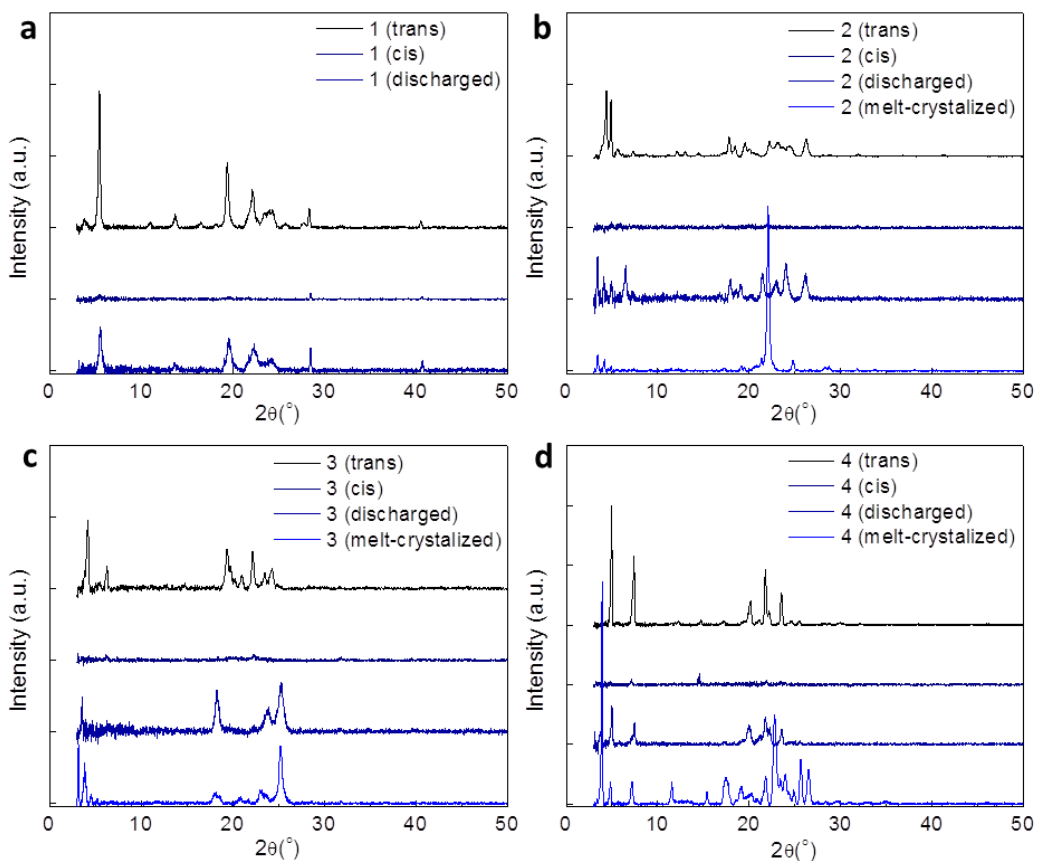

**Fig. S10.** Thermogravimetric analysis (TGA) plots for monomer **1-4**. Decomposition temperatures range from 260 °C to 290 °C. Heating was conducted from 50 °C to 800 °C at a rate of 20 °C min<sup>-1</sup>.

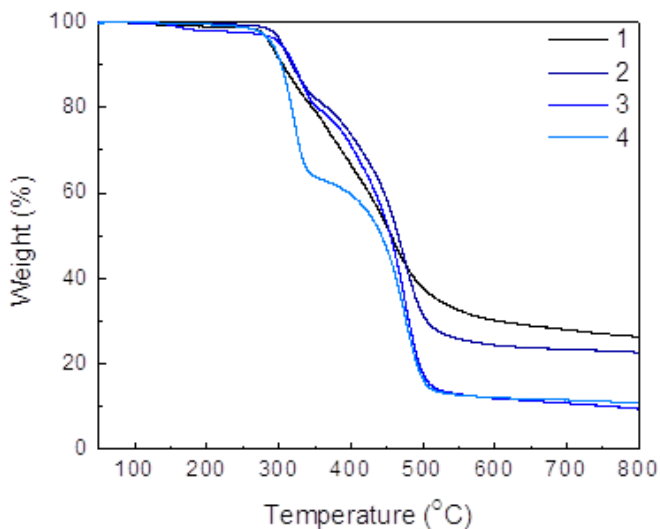



**Fig. S11.**  $^1\text{H}$  and  $^{13}\text{C}$  NMR spectra of compound **1** (a,b), **2** (c,d), **3** (e,f), **4** (g,h), **5** (i,j), **6** (k,l), **7** (m,n), and **8** (o,p).

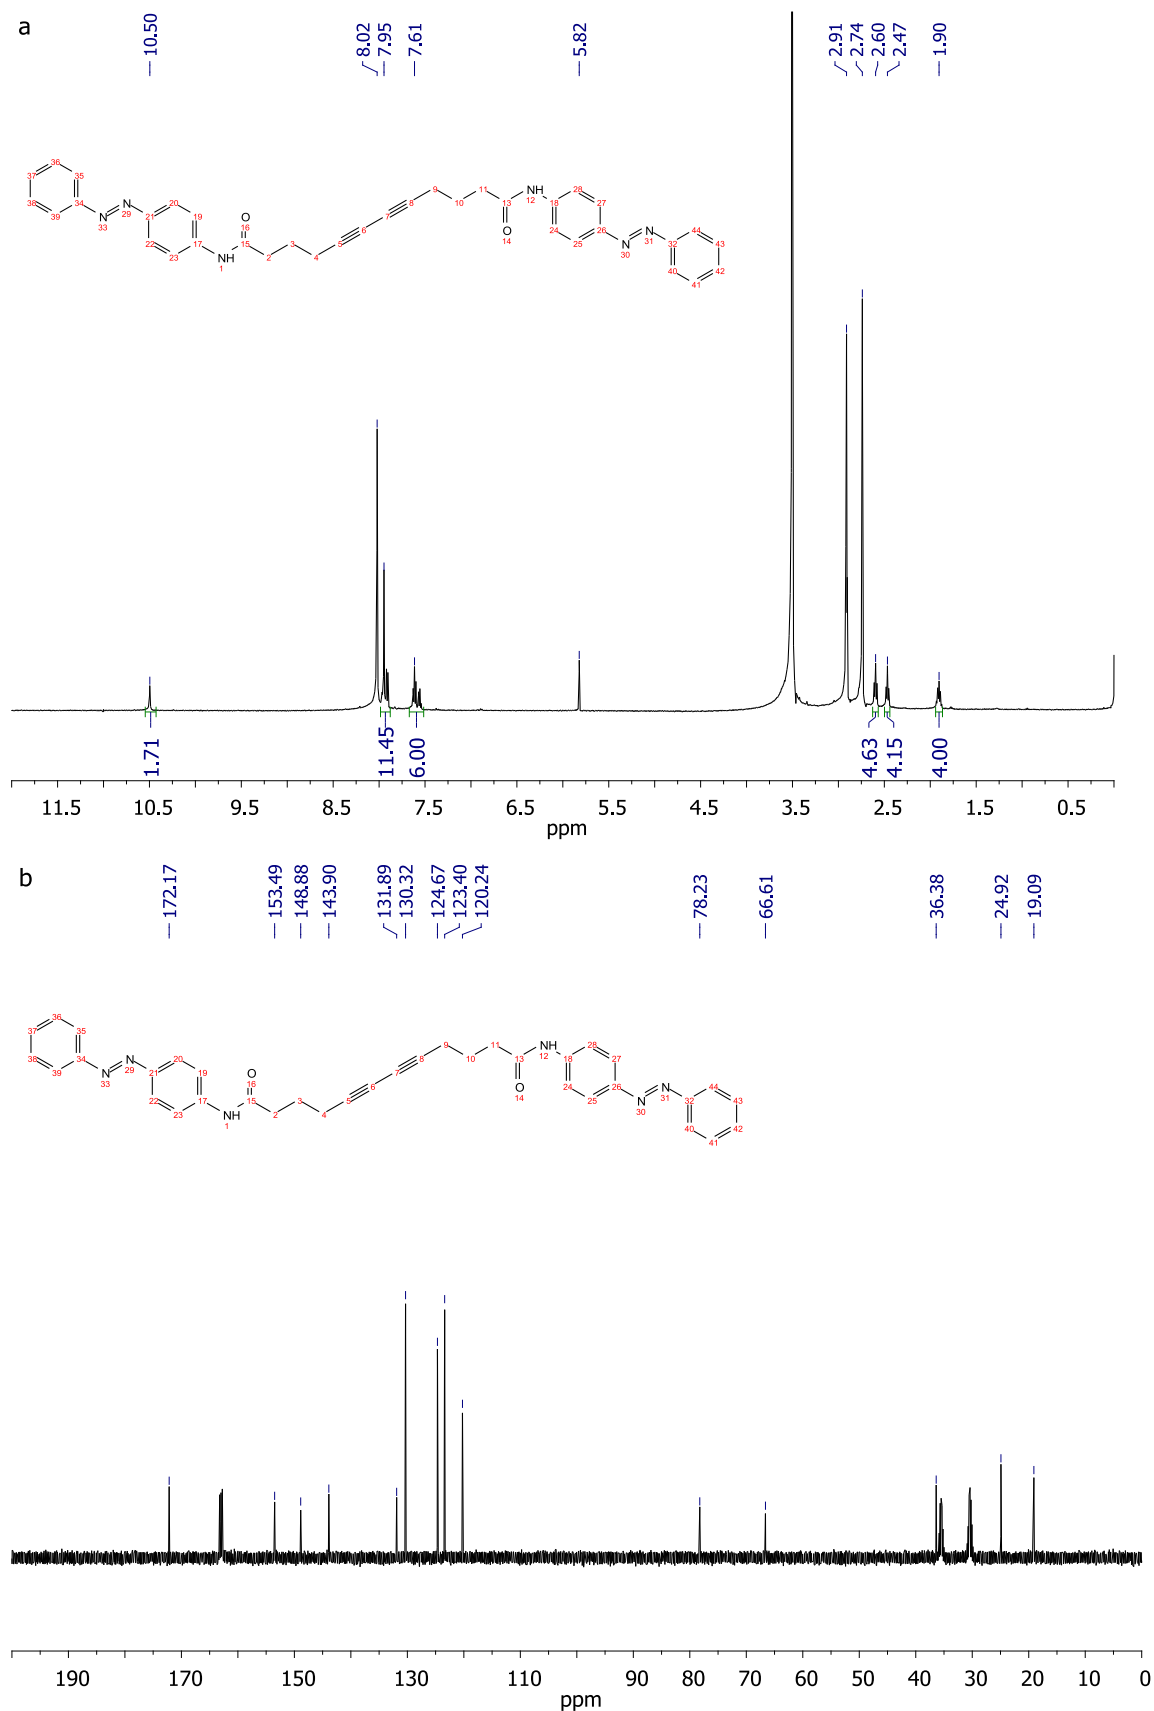



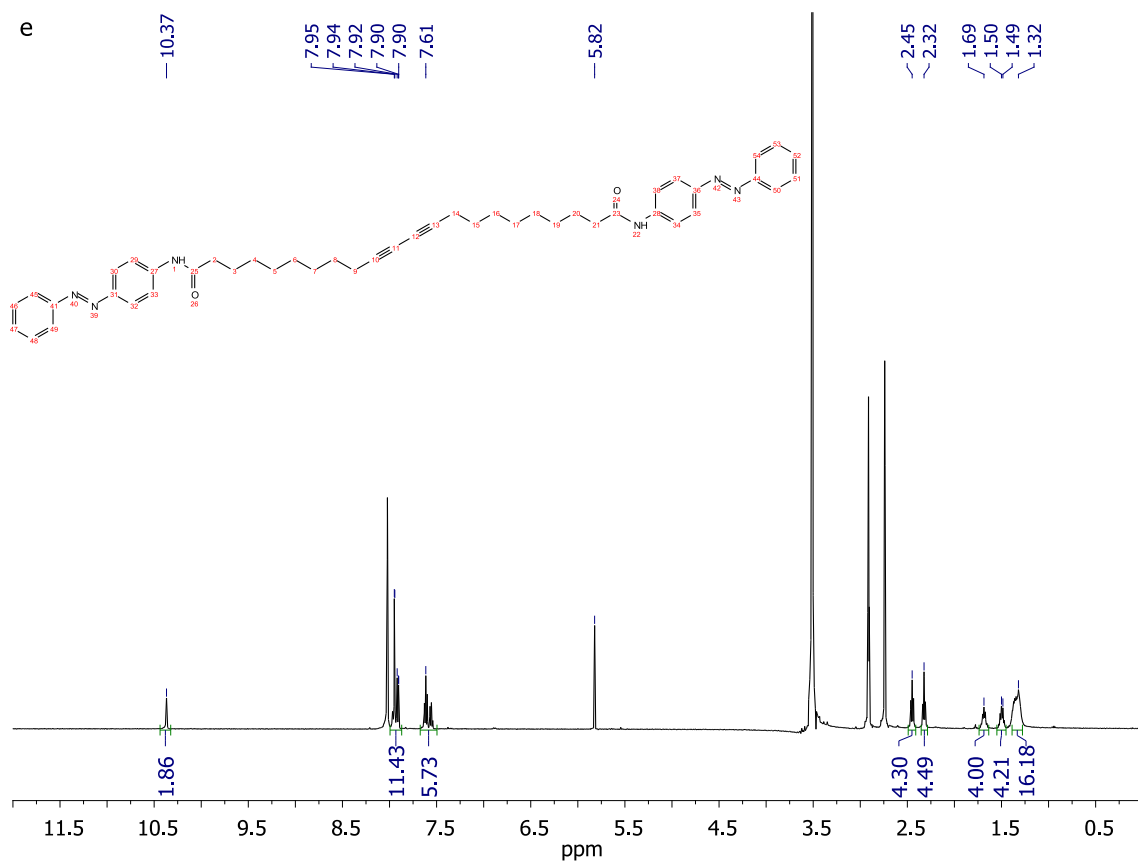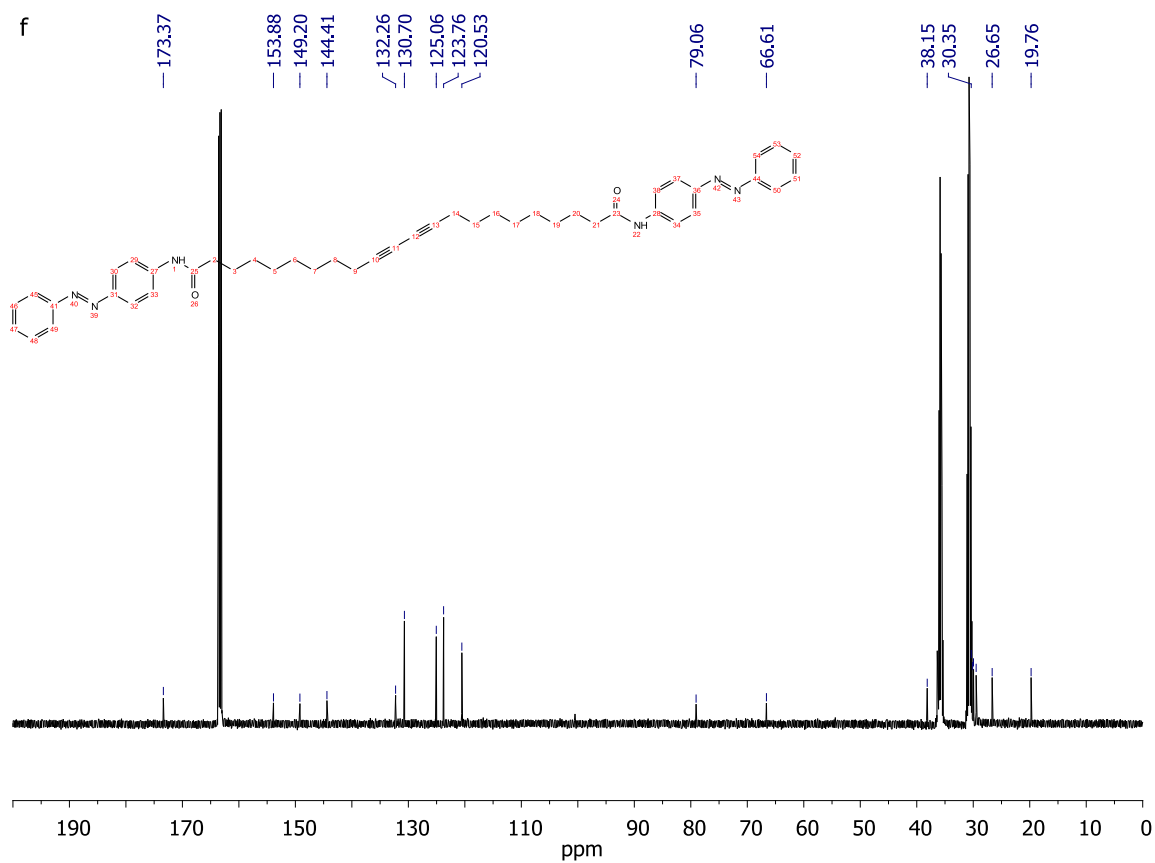

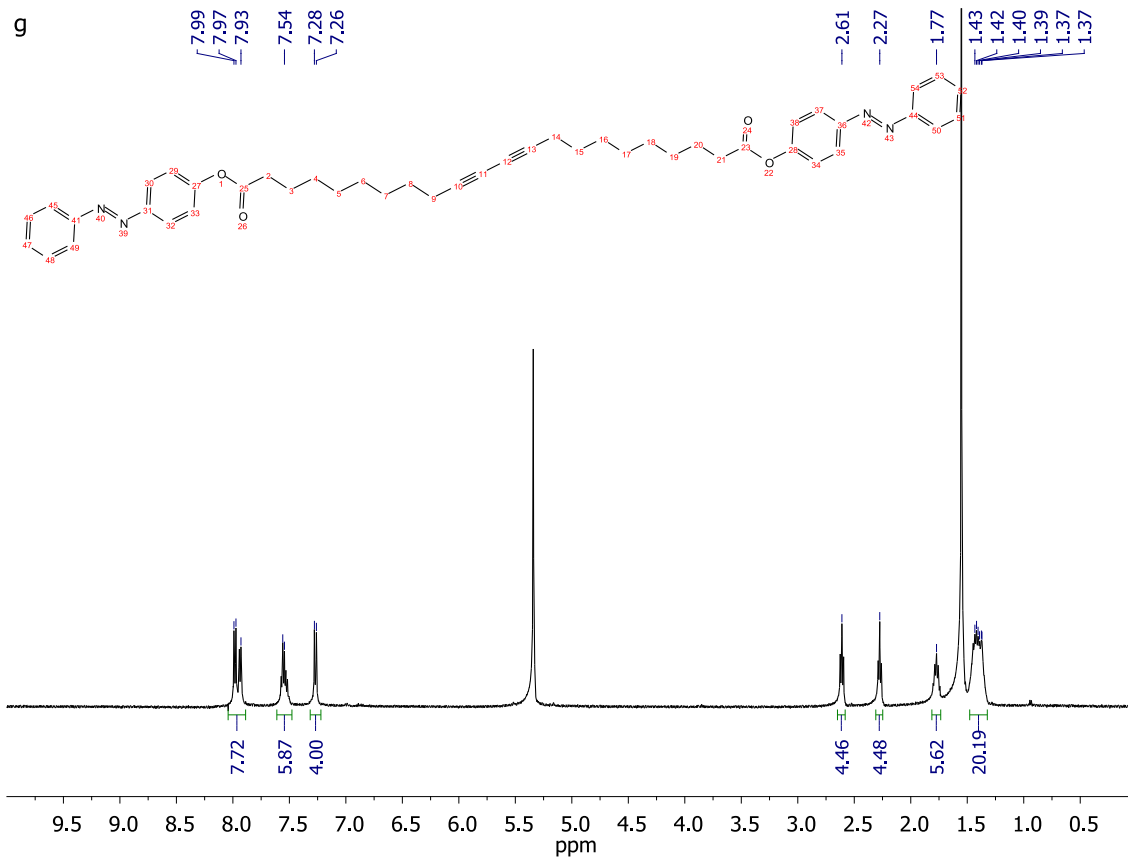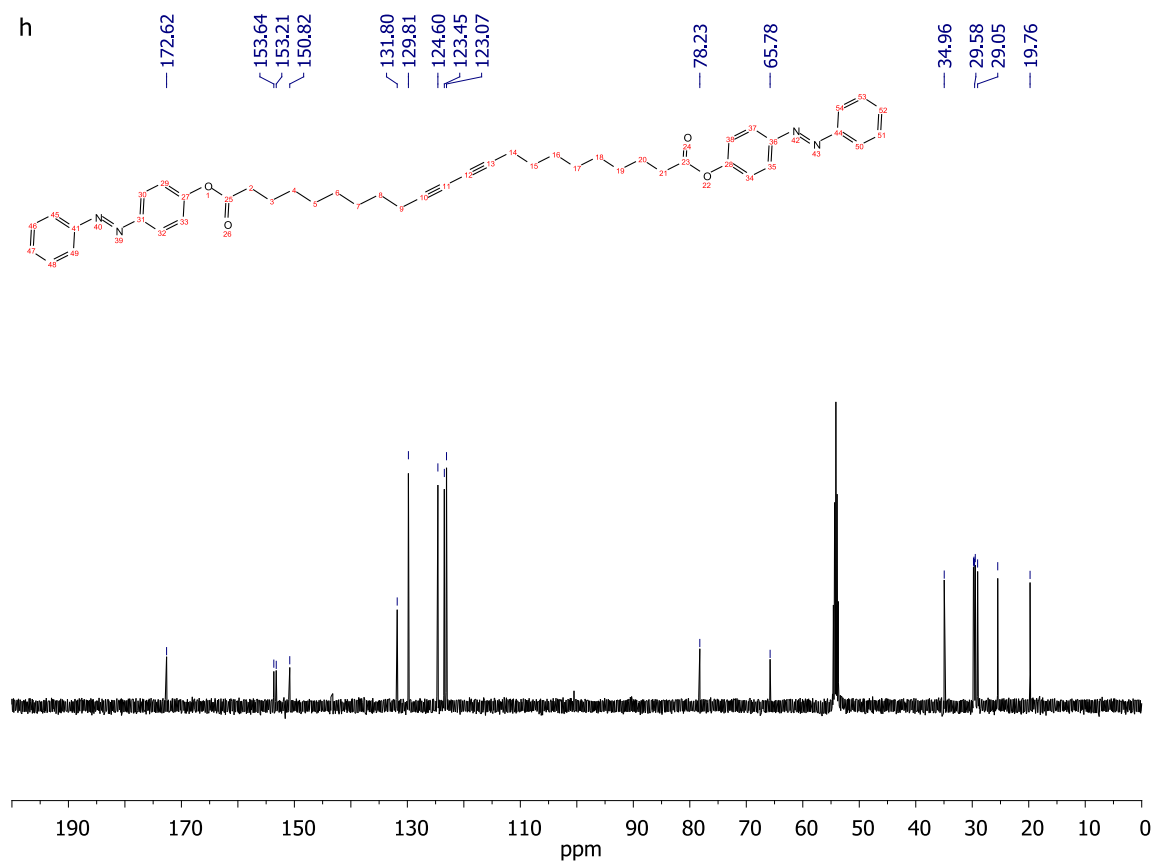

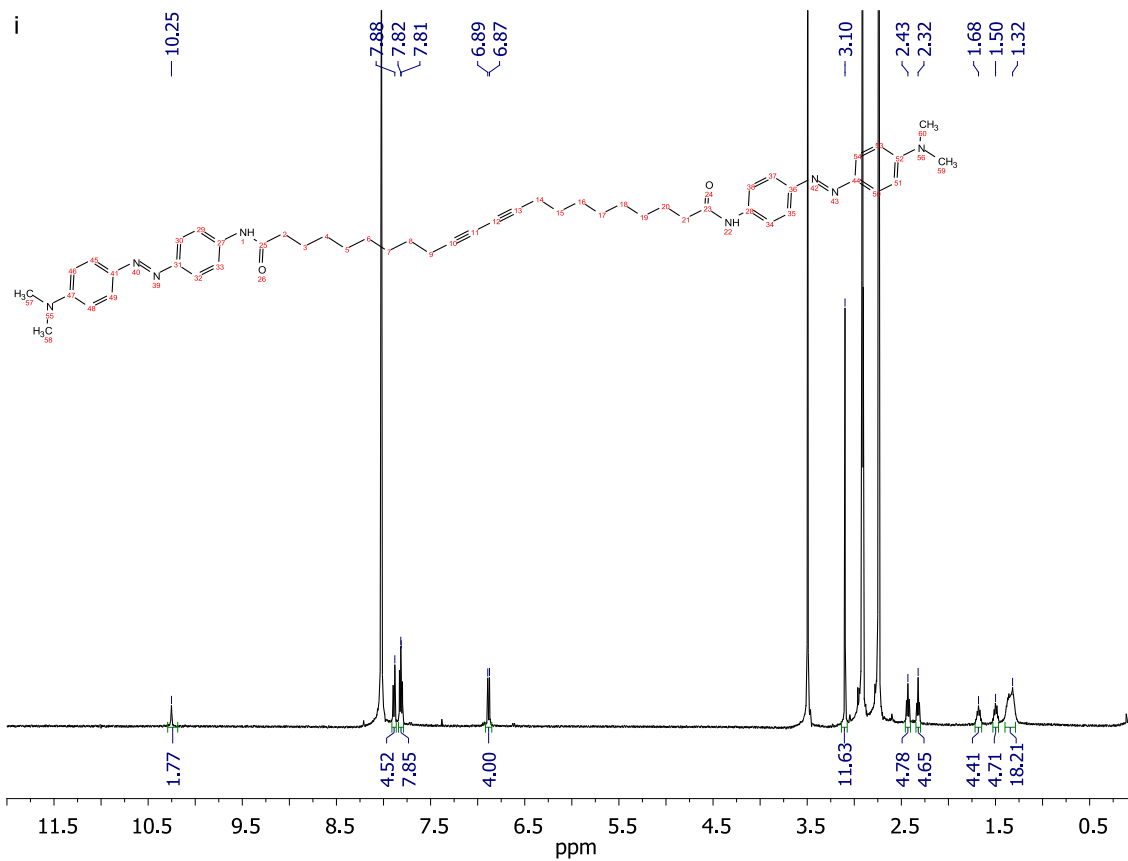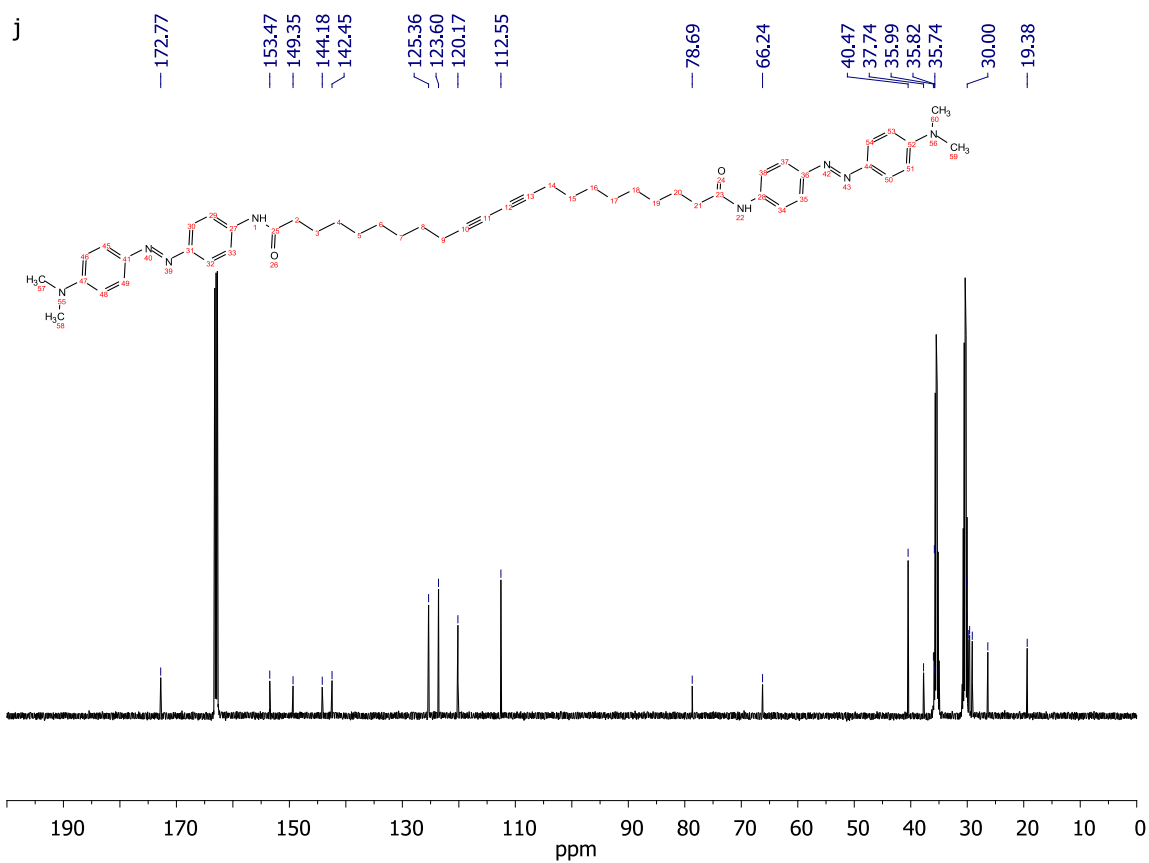

**k**

Chemical structure of compound **10** is shown above the spectrum. The structure is a complex molecule featuring a biphenyl core with four hydroxyl groups, a long aliphatic chain containing a triple bond, a carboxylic acid group, and a phenyl ring with two hydroxyl groups. The atoms are numbered 1 through 64.

<sup>1</sup>H NMR spectrum (DMSO-*d*<sub>6</sub>) of compound **10**. The x-axis represents the chemical shift in ppm, ranging from 0.5 to 11.5. The spectrum shows several peaks, with integration values provided below the baseline. The chemical structure of compound **10** is shown above the spectrum, with atoms numbered 1 through 64.

| Chemical Shift (ppm) | Integration |
|----------------------|-------------|
| ~10.22               | 1.69        |
| ~7.80                | 4.00        |
| ~7.78                | 7.34        |
| ~6.92                | 3.57        |
| ~3.76                | 7.66        |
| ~3.67                | 8.18        |
| ~2.42                | 4.51        |
| ~2.32                | 4.33        |
| ~1.68                | 4.42        |
| ~1.50                | 5.07        |
| ~1.48                | 18.23       |

The figure displays the <sup>13</sup>C NMR spectrum of compound 10, with the chemical structure overlaid. The x-axis represents the chemical shift in ppm, ranging from 0 to 190. The spectrum shows several sharp peaks, with the most prominent ones at approximately 172.69, 151.88, 149.46, 143.90, 142.21, 125.52, 123.58, 120.16, 112.39, 78.69, 66.25, 59.85, 54.80, 37.76, 29.59, and 19.40 ppm. The chemical structure of compound 10 is shown above the spectrum, with carbon atoms numbered 1 through 68. The structure includes a central chain with various functional groups, including hydroxyl groups, amide groups, and a complex ring system.

m

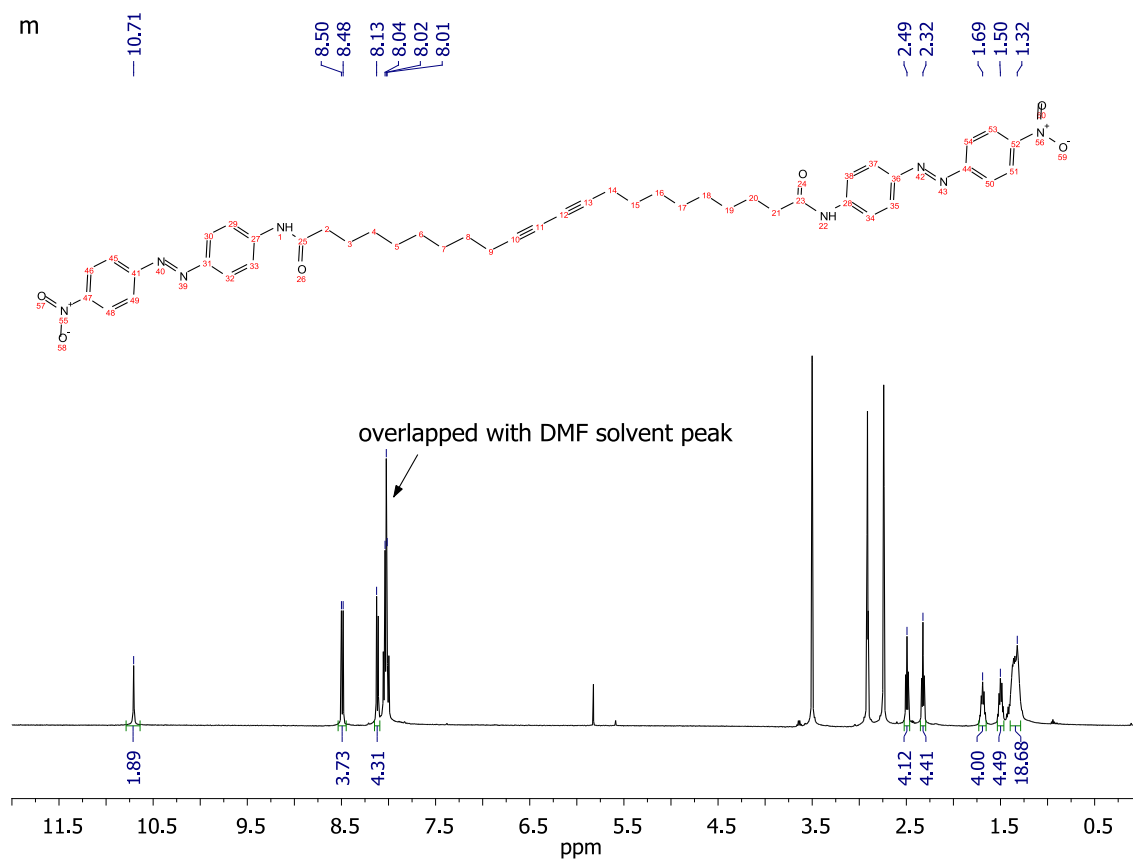

n

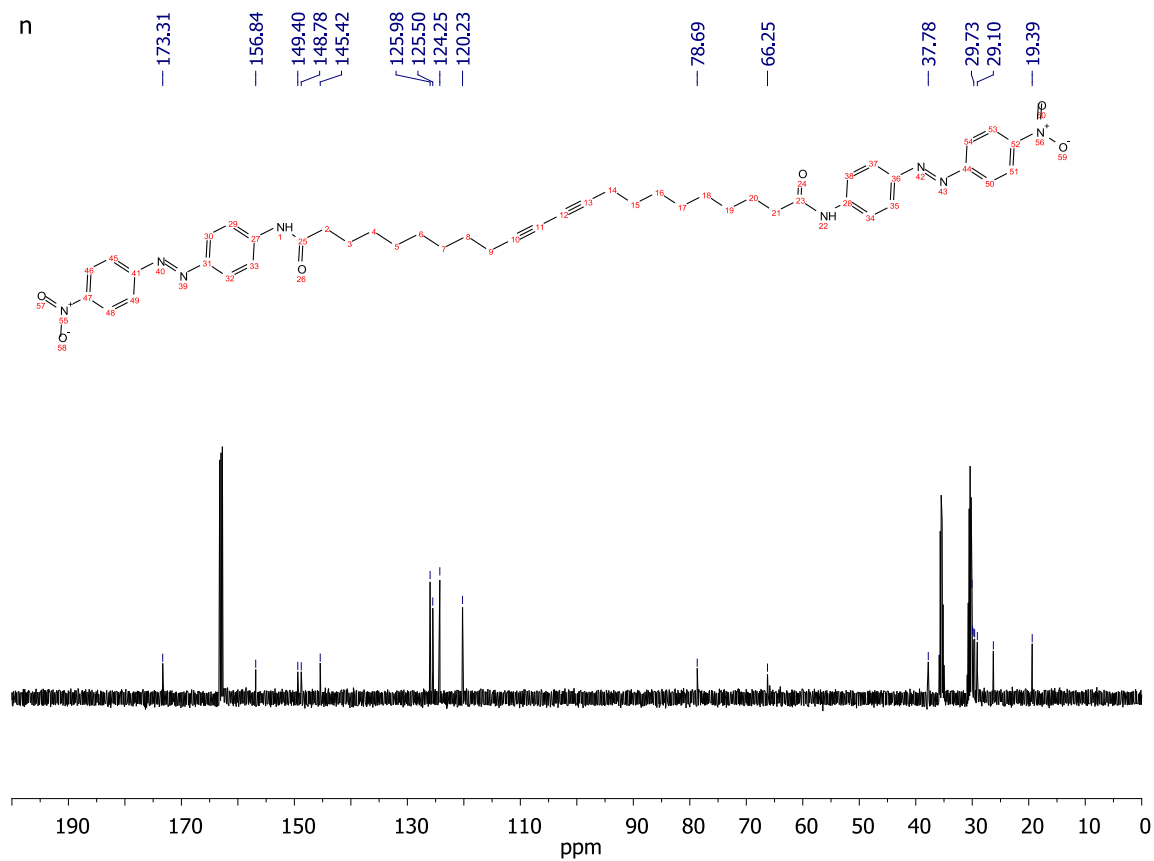

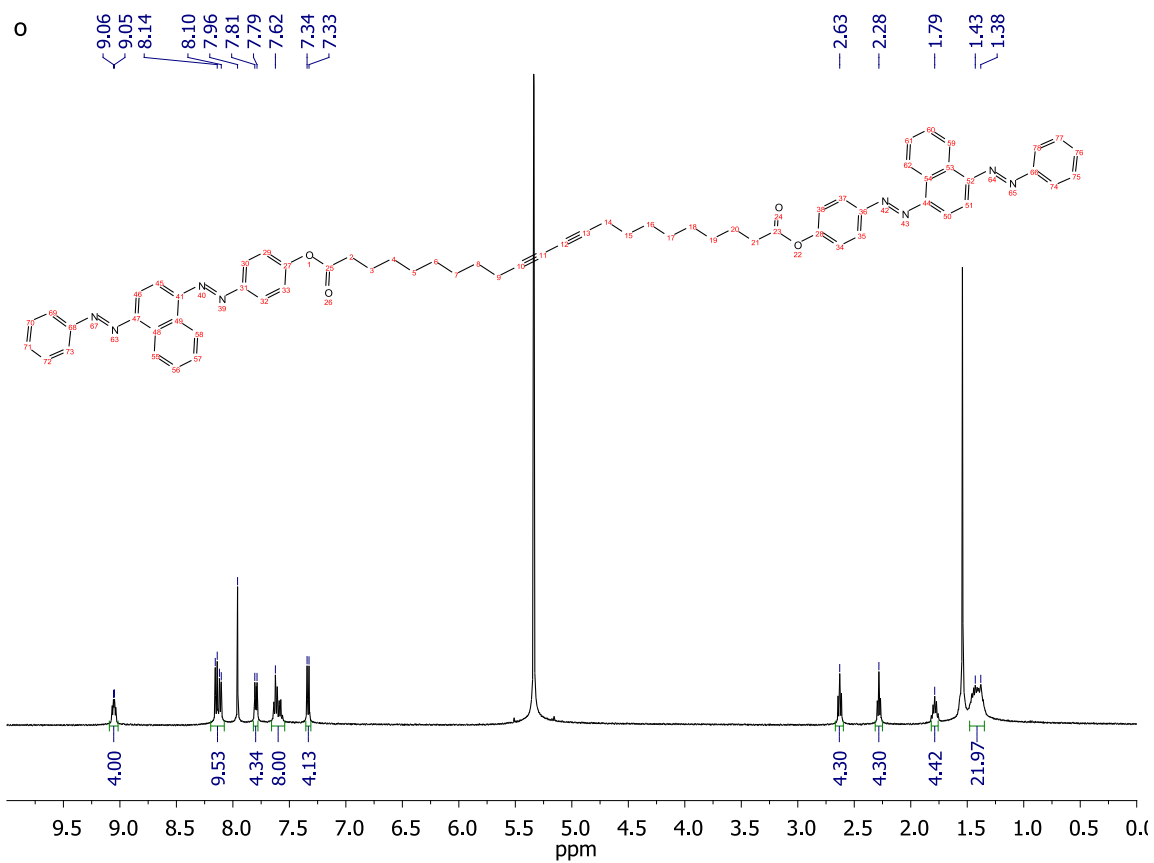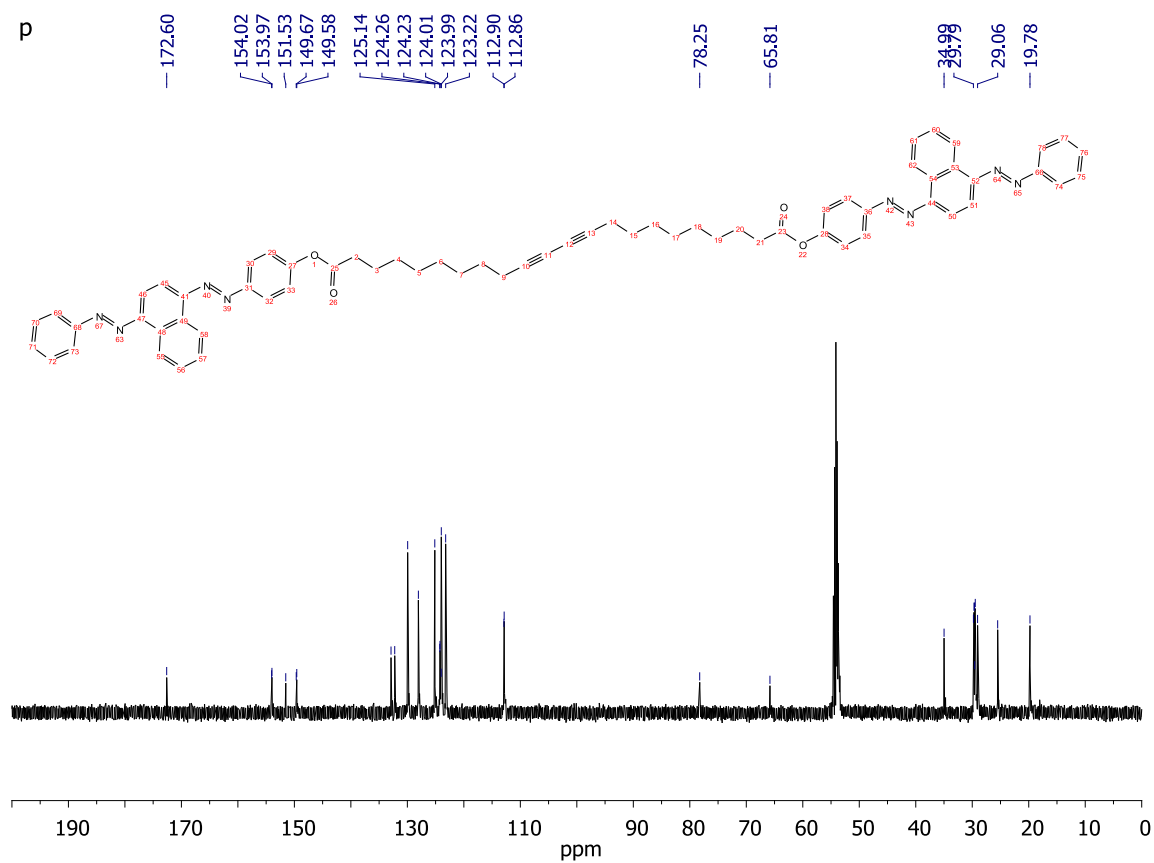



**Table S2.** X-ray experimental details for compound **3**

|                                       |                                                                                                                                                      |
|---------------------------------------|------------------------------------------------------------------------------------------------------------------------------------------------------|
| Identification code                   | Compound 3                                                                                                                                           |
| Empirical formula                     | C <sub>46</sub> H <sub>52</sub> N <sub>6</sub> O <sub>2</sub>                                                                                        |
| Formula weight                        | 720.93                                                                                                                                               |
| Temperature                           | 100(2) K                                                                                                                                             |
| Wavelength                            | 0.71073 Å                                                                                                                                            |
| Crystal system                        | Triclinic                                                                                                                                            |
| Space group                           | P -1                                                                                                                                                 |
| Unit cell dimensions                  | $a = 5.9062(7)$ Å<br>$b = 7.7504(9)$ Å<br>$c = 42.123(5)$ Å<br>$\alpha = 87.000(2)^\circ$<br>$\beta = 89.311(2)^\circ$<br>$\gamma = 86.210(2)^\circ$ |
| Volume                                | 1921.3(4) Å <sup>3</sup>                                                                                                                             |
| Z                                     | 2                                                                                                                                                    |
| Density (calculated)                  | 1.246 mg m <sup>-3</sup>                                                                                                                             |
| Absorption coefficient                | 0.077 mm <sup>-1</sup>                                                                                                                               |
| $F(000)$                              | 772                                                                                                                                                  |
| Crystal size                          | 0.230 x 0.135 x 0.030 mm <sup>3</sup>                                                                                                                |
| $\theta$ range for data collection    | 0.968 to 28.283°                                                                                                                                     |
| Index ranges                          | -7 ≤ $h$ ≤ 7, -10 ≤ $k$ ≤ 9, -56 ≤ $l$ ≤ 55                                                                                                          |
| Reflections collected                 | 31218                                                                                                                                                |
| Independent reflections               | 8750 [ $R_{int} = 0.0334$ ]                                                                                                                          |
| Absorption correction                 | Multi-scan                                                                                                                                           |
| Max. and min. transmission            | 0.7461 and 0.6528                                                                                                                                    |
| Refinement method                     | Full-matrix least-squares on $F^2$                                                                                                                   |
| Data / restraints / parameters        | 8750 / 2 / 493                                                                                                                                       |
| Goodness-of-fit <sup>a</sup> on $F^2$ | 1.044                                                                                                                                                |
| $R_1^b$                               | 0.0738                                                                                                                                               |
| $wR_2^c$                              | 0.2094                                                                                                                                               |

<sup>a</sup> GOF =  $(\sum w(F_o^2 - F_c^2)^2 / (n - p))^{1/2}$  where  $n$  is the number of data and  $p$  is the number of parameters refined. <sup>b</sup>  $R_1 = \sum ||F_o| - |F_c|| / \sum |F_o|$ . <sup>c</sup>  $wR_2 = (\sum (w(F_o^2 - F_c^2)^2) / \sum (w(F_o^2)^2))^{1/2}$
